# Supplementary material for: Evolutionary Accessibility of Mutational Pathways
Source: PLOS journal article supplement (doi:10.1371/journal.pcbi.1002134), 2011-08-18
Supplement: S1 (10.1371/journal.pcbi.1002134.s001) [file journal.pcbi.1002134.s001]

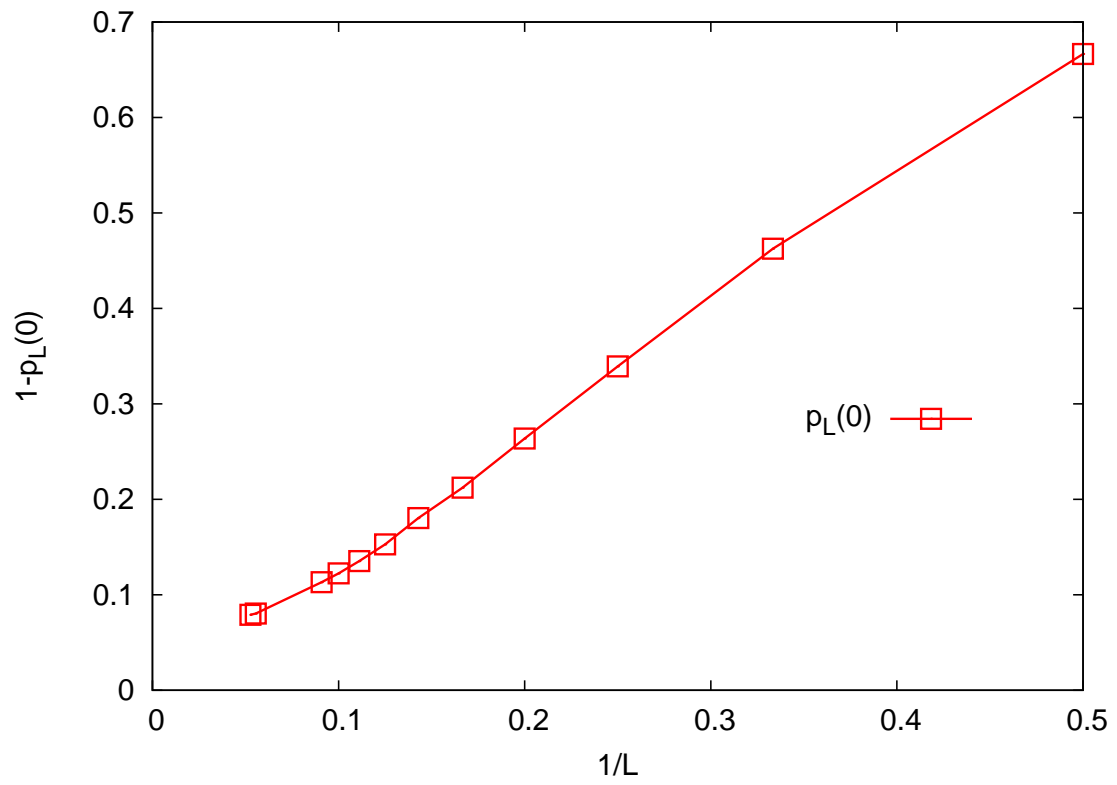

Figure S1: Plot of  $1 - p_L(0)$  as function of  $1/L$  for the HoC model. While the extrapolation to  $1/L = 0$  is not straightforward,  $1 - p_L(0)$  clearly decreases monotonically with a limiting value below 0.1.
