# Supplementary material for: Evolutionary Accessibility of Mutational Pathways
Source: PLOS journal article supplement (doi:10.1371/journal.pcbi.1002134), 2011-08-18
Supplement: S2 (10.1371/journal.pcbi.1002134.s002) [file journal.pcbi.1002134.s002]

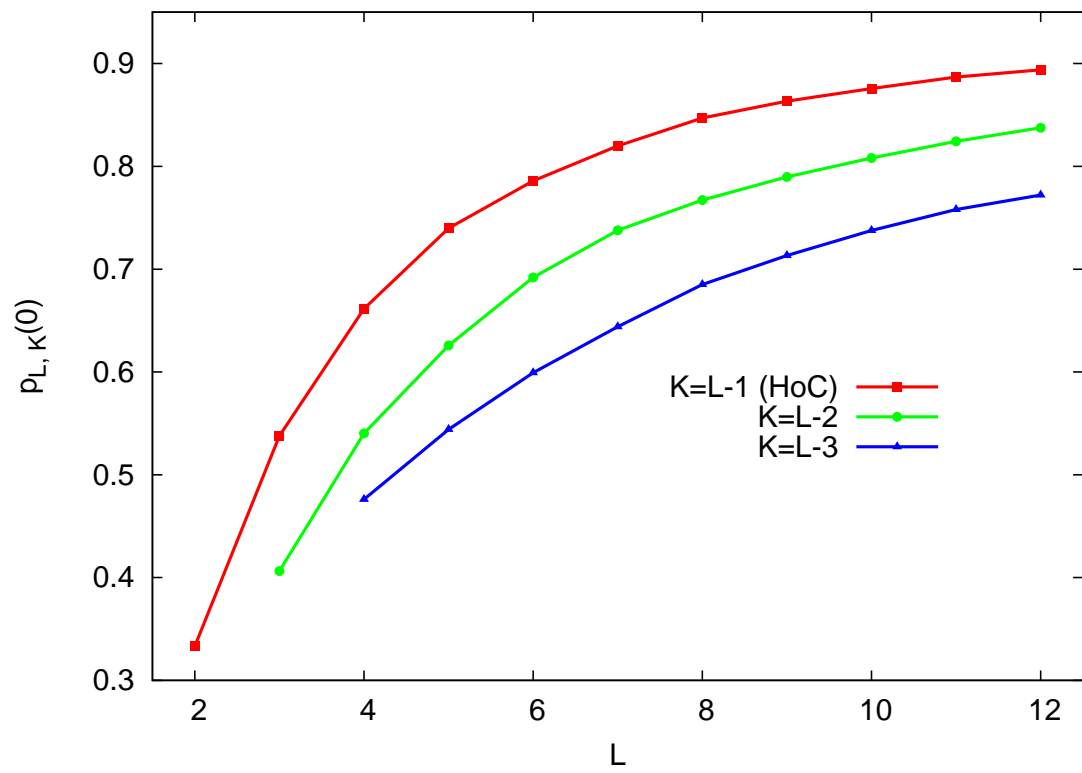

Figure S2: Simulation results for the probability of finding no accessible path in the  $LK$ -model when the number of non-interacting loci  $L - K$  is kept fixed.
