# Supplementary material for: Evolutionary Accessibility of Mutational Pathways
Source: PLOS journal article supplement (doi:10.1371/journal.pcbi.1002134), 2011-08-18
Supplement: S4 (10.1371/journal.pcbi.1002134.s004) [file journal.pcbi.1002134.s004]

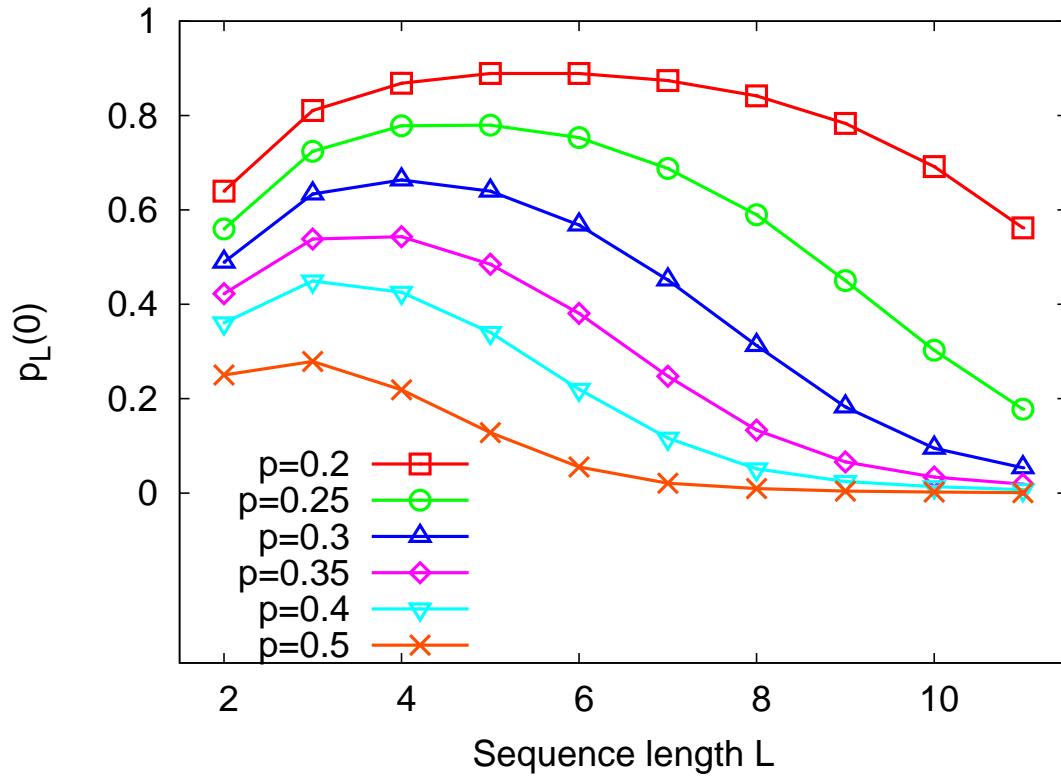

Figure S4: Simulation results for the probability of finding no shortest connected path between two viable antipodal genotypes for the holey landscape (neutral) model at different viability probabilities  $p$ . In these simulations the initial genotype and its antipode were constrained to be viable.
