# Supplementary material for: Evolutionary Accessibility of Mutational Pathways
Source: PLOS journal article supplement (doi:10.1371/journal.pcbi.1002134), 2011-08-18
Supplement: S5 (10.1371/journal.pcbi.1002134.s005) [file journal.pcbi.1002134.s005]

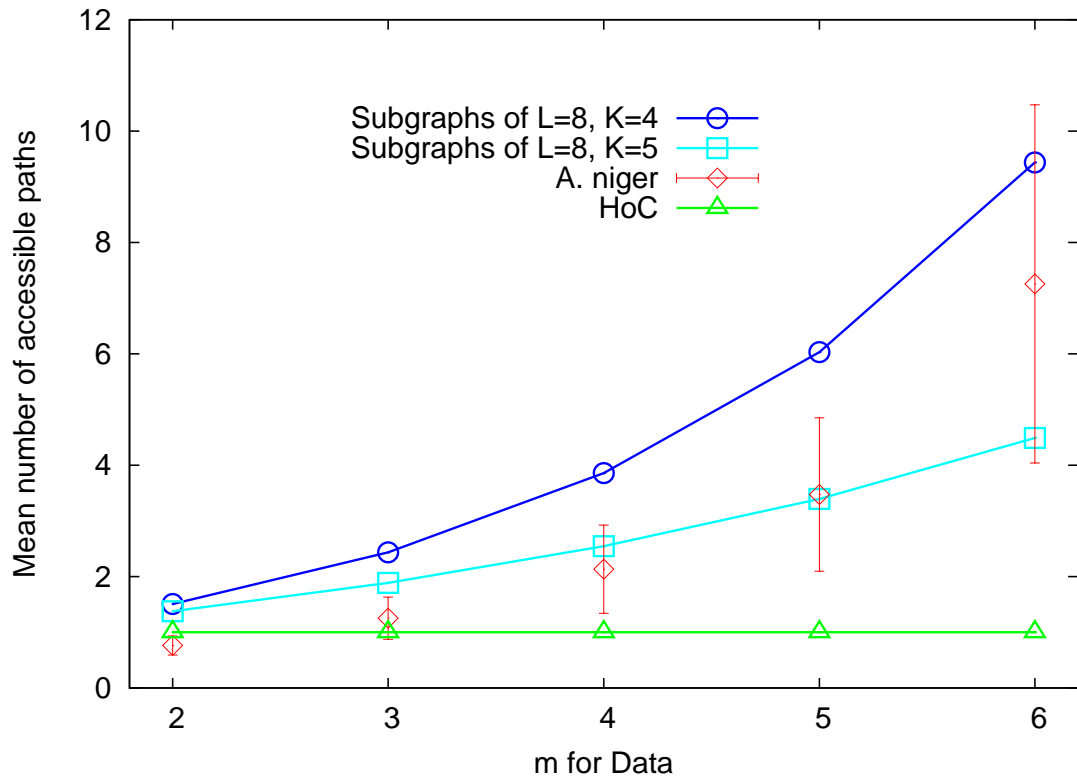

Figure S5: Mean number of accessible paths obtained from subgraph analysis of the *A. niger* landscape (diamonds with error bars) compared to the results of a subgraph analysis of  $LK$ -landscapes with  $L = 8$ ,  $K = 4$  (circles) and  $K = 5$  (squares) and  $K = 7$  (triangles).
