# Supplementary material for: Evolutionary Accessibility of Mutational Pathways
Source: PLOS journal article supplement (doi:10.1371/journal.pcbi.1002134), 2011-08-18
Supplement: S6 (10.1371/journal.pcbi.1002134.s006) [file journal.pcbi.1002134.s006]

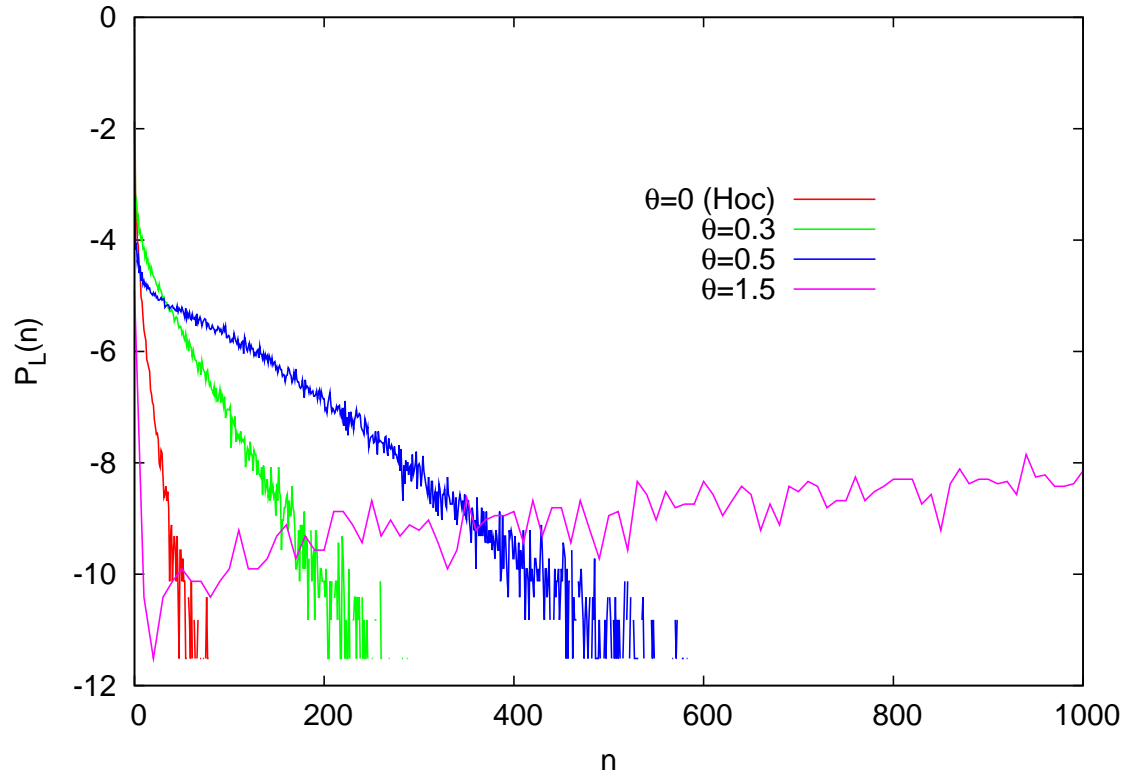

Figure S6: Distribution of the number of accessible paths in the RMF model with  $L = 7$ . Note that the behavior for the HoC-case  $\theta = 0$  is typical for small values of  $\theta$  with most of the probabilistic weight on  $n = 0$ . This changes for larger values of  $\theta$ , where the probabilistic weight shifts towards many accessible paths. This effect becomes more pronounced as  $L$  grows.
