# Supplementary material for: Evolutionary Accessibility of Mutational Pathways
Source: PLOS journal article supplement (doi:10.1371/journal.pcbi.1002134), 2011-08-18
Supplement: S8 (10.1371/journal.pcbi.1002134.s008) [file journal.pcbi.1002134.s008]

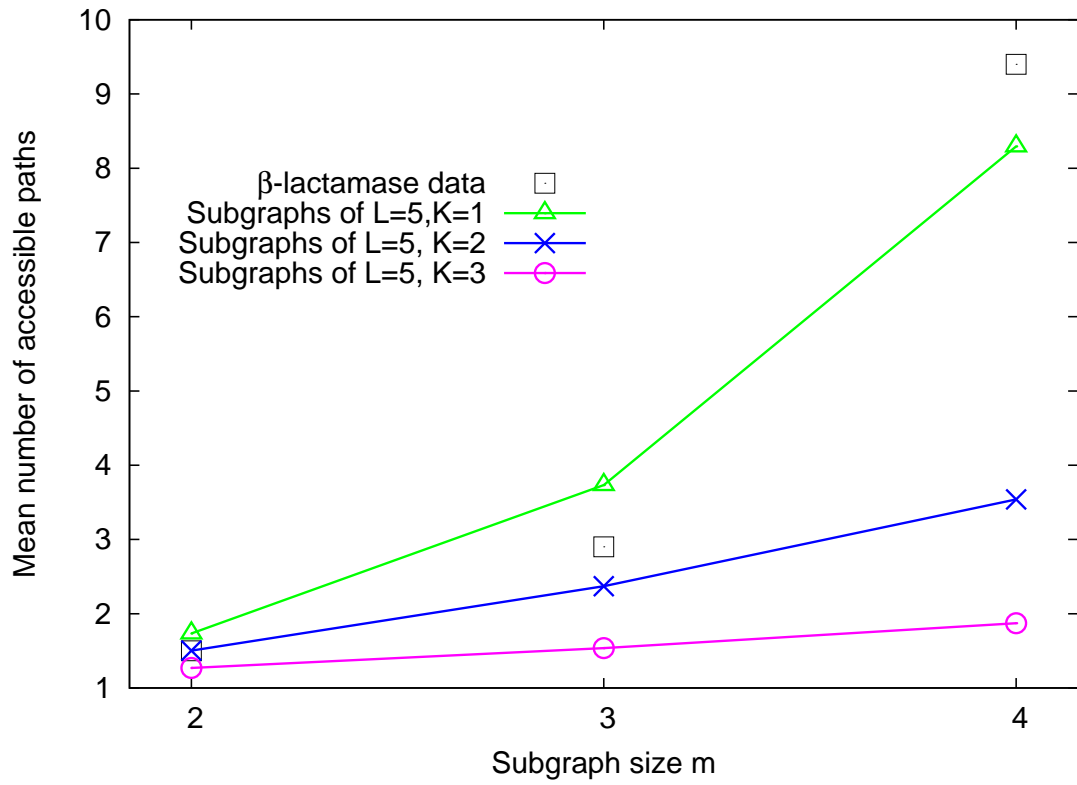

Figure S8: Mean number of accessible paths obtained from subgraph analysis of the TEM1  $\beta$ -lactamase resistance landscape of Weinreich et al.[3] (squares) compared to the results of a subgraph analysis of  $LK$ -landscapes with  $L = 5$ ,  $K = 1$  (triangles),  $K = 2$  (crosses) and  $K = 3$  (circles).
